# Supplementary material for: Topography of cancer-associated immune cells in human solid tumors
Source: eLife. 2018 Sep 4;7:e36967. doi: 10.7554/eLife.36967 (PMC6133554; doi:10.7554/eLife.36967)
Supplement: Supplementary file 3. — In this table, we report all raw measurements for all samples that were used in this study. Column names are: ‘class’ (tumor type as listed above), ‘patient’ (patient pseudonym), ‘antigen’ (antigen for immunostain), ‘TU_CORE_cells_mm2’ (number of positively stained cells per square millimeter in the tumor core), ‘MARG_500_IN_cells_mm2’ (number of positively stained cells per square millimeter in the inner invasive margin, defined as ranging 0–500 µm to the inside from the tumor edge), ‘MARG_500_OUT_cells_mm2’ (number of positively stained cells per square millimeter in the inner invasive margin, defined as ranging 0–500 µm to the outside from the tumor edge). [file elife-36967-supp3.xlsx]

## Sheet: Sheet1
Class	Patient_ID	Antigen	Cells_per_mm2_tumor_core	Cells_per_mm2_margin_500um_inside	Cells_per_mm2_margin_500um_outside
BLCA	14Q9H6	CD163	701.18	157.93	191.66
BLCA	14Q9H6	CD3	148.74	97.1	379.64
BLCA	14Q9H6	CD68	269.94	103.14	225.07
BLCA	14Q9H6	CD8	67.78	25.86	117.43
BLCA	14Q9H6	Foxp3	9.998	6.738	30.81
BLCA	14Q9H6	PD1	3.932	0.5347	3.231
BLCA	16M1J5	CD163	476.12	892.36	913.67
BLCA	16M1J5	CD3	274.21	491.5	486.88
BLCA	16M1J5	CD68	729.89	605.58	398.92
BLCA	16M1J5	CD8	244.35	554.49	1677.4
BLCA	16M1J5	Foxp3	289	163.49	69.11
BLCA	16M1J5	PD1	2.908	47.58	135.1
BLCA	17FQ78	CD163	69.92	198.97	1198.9
BLCA	17FQ78	CD3	108.83	178.6	780.3
BLCA	17FQ78	CD68	114.15	116.52	1150.8
BLCA	17FQ78	CD8	37.63	144.6	405.33
BLCA	17FQ78	Foxp3	55.77	38.49	203.34
BLCA	17FQ78	PD1	22.1	35.42	62.82
BLCA	1QA2V8	CD163	230.39	409.39	1313.9
BLCA	1QA2V8	CD3	63.6	101.73	575.93
BLCA	1QA2V8	CD68	189.7	343.07	1144.9
BLCA	1QA2V8	CD8	115.54	108.07	282.91
BLCA	1QA2V8	Foxp3	33.25	20.22	38.37
BLCA	1QA2V8	PD1	13.8	4.441	29.14
BLCA	1S1P9D	CD163	504.96	626.53	670.05
BLCA	1S1P9D	CD3	381.47	259.72	346.23
BLCA	1S1P9D	CD68	375.15	235.28	367.8
BLCA	1S1P9D	CD8	327.46	90.06	360.91
BLCA	1S1P9D	Foxp3	34.26	20.12	75.21
BLCA	1S1P9D	PD1	60.29	45.12	34.37
BLCA	6BHUDF	CD163	3199.4	2962.8	931.41
BLCA	6BHUDF	CD3	2007.1	1858.5	895.05
BLCA	6BHUDF	CD68	1657.7	1581.6	632.45
BLCA	6BHUDF	CD8	4628.8	3588.4	526.07
BLCA	6BHUDF	Foxp3	1.587	3.112	2.601
BLCA	6BHUDF	PD1	0	0	6.698
BLCA	AXLLBE	CD163	663.62	813.65	851.89
BLCA	AXLLBE	CD3	343.82	363.57	366.02
BLCA	AXLLBE	CD68	206.17	212.33	93.12
BLCA	AXLLBE	CD8	188.32	275.72	331.73
BLCA	AXLLBE	Foxp3	34.49	64.72	46.49
BLCA	AXLLBE	PD1	21.04	28.93	34.62
BLCA	AXO4PD	CD163	255.08	311.97	823.98
BLCA	AXO4PD	CD3	45.91	86.58	486.6
BLCA	AXO4PD	CD68	217.26	76.89	147.44
BLCA	AXO4PD	CD8	30.28	57.81	176.91
BLCA	AXO4PD	Foxp3	25.28	76.09	66.01
BLCA	AXO4PD	PD1	20.07	14.51	12.54
BLCA	CMW76R	CD163	29.09	72.93	759.35
BLCA	CMW76R	CD3	11.69	41.49	289.79
BLCA	CMW76R	CD68	643.61	499.37	253.93
BLCA	CMW76R	CD8	176.39	330.73	315.41
BLCA	CMW76R	Foxp3	1.13	5.462	16.37
BLCA	CMW76R	PD1	2.536	0	15.92
BLCA	GK7PP	CD163	495.52	883.64	852.29
BLCA	GK7PP	CD3	184.83	414.88	246.44
BLCA	GK7PP	CD68	336.63	630.44	196.64
BLCA	GK7PP	CD8	181.2	353.63	252.12
BLCA	GK7PP	Foxp3	103.58	286.99	16.67
BLCA	GK7PP	PD1	2.425	19.71	5.693
BLCA	JQ4Z86	CD163	1169.4	1560.9	1408.4
BLCA	JQ4Z86	CD3	842	1255.3	1214.8
BLCA	JQ4Z86	CD68	922.18	1188.4	1419.9
BLCA	JQ4Z86	CD8	729.68	857.1	486.96
BLCA	JQ4Z86	Foxp3	41.32	133.93	141.13
BLCA	JQ4Z86	PD1	354.19	186.17	70.35
BLCA	WF0TF	CD163	370.64	926.04	1072.5
BLCA	WF0TF	CD3	34.98	209.66	215.68
BLCA	WF0TF	CD68	196.99	440.65	588.81
BLCA	WF0TF	CD8	102.63	119.14	668.81
BLCA	WF0TF	Foxp3	96.45	153.88	177.77
BLCA	WF0TF	PD1	1.077	2.501	1.247
BLCA	XBM961	CD163	948.88	1171.8	1366.9
BLCA	XBM961	CD3	246.54	582.39	495.69
BLCA	XBM961	CD68	740.1	1135.3	839.96
BLCA	XBM961	CD8	306.5	775	570.11
BLCA	XBM961	Foxp3	112.01	306.83	138.22
BLCA	XBM961	PD1	5.645	3.745	4.853
COAD_MET	15QWK5	CD163	138.55	437.38	2078.2
COAD_MET	15QWK5	CD3	4.72	72.99	1103.5
COAD_MET	15QWK5	CD68	167.58	424.62	1294.9
COAD_MET	15QWK5	CD8	10.94	27.01	475.42
COAD_MET	15QWK5	Foxp3	0	12.01	13.35
COAD_MET	15QWK5	PD1	4.783	0	0
COAD_MET	17Z30O	CD163	292.6	1003.8	1289
COAD_MET	17Z30O	CD3	160.65	585.12	1025.6
COAD_MET	17Z30O	CD68	917.73	1049.5	866.37
COAD_MET	17Z30O	CD8	51.11	164.7	455.56
COAD_MET	17Z30O	Foxp3	29.89	65.01	58.9
COAD_MET	17Z30O	PD1	0	25.43	75.54
COAD_MET	1BX3N0	CD163	171.1	3872.1	3931.5
COAD_MET	1BX3N0	CD3	38.81	131.59	690.93
COAD_MET	1BX3N0	CD68	755.15	1864.6	2379.9
COAD_MET	1BX3N0	CD8	2.661	3.422	107.51
COAD_MET	1BX3N0	Foxp3	2.727	9.594	48.86
COAD_MET	1BX3N0	PD1	3.599	20.89	105.83
COAD_MET	1M4M2X	CD163	332.72	586.91	1102.2
COAD_MET	1M4M2X	CD3	200.41	262.67	621.4
COAD_MET	1M4M2X	CD68	949.82	553.48	644.92
COAD_MET	1M4M2X	CD8	123.8	428.07	1301.5
COAD_MET	1M4M2X	Foxp3	45.31	117.88	168.47
COAD_MET	1M4M2X	PD1	8.246	0	0
COAD_MET	1MDI4V	CD163	235.17	331.92	1417.6
COAD_MET	1MDI4V	CD3	30.36	52.28	1511
COAD_MET	1MDI4V	CD68	249.7	269	1521.7
COAD_MET	1MDI4V	CD8	32.95	50.39	896.33
COAD_MET	1MDI4V	Foxp3	44.08	18.82	78.58
COAD_MET	1MDI4V	PD1	1.046	7.001	54.34
COAD_MET	1SKNW5	CD163	100.85	199.44	1911.3
COAD_MET	1SKNW5	CD3	163.77	466.52	2510.2
COAD_MET	1SKNW5	CD68	57.03	112.98	601.55
COAD_MET	1SKNW5	CD8	429.42	595.97	1074.5
COAD_MET	1SKNW5	Foxp3	28.68	28.22	85.6
COAD_MET	1SKNW5	PD1	2.017	7.677	11.04
COAD_MET	1UUVJF	CD163	103.29	468.75	2069.3
COAD_MET	1UUVJF	CD3	10.86	16.59	563.62
COAD_MET	1UUVJF	CD68	94.24	137.12	517.14
COAD_MET	1UUVJF	CD8	9.383	83.67	439.08
COAD_MET	1UUVJF	Foxp3	13.36	5.266	31.25
COAD_MET	1UUVJF	PD1	0	0	25.73
COAD_MET	1UW7FT	CD163	80.81	520.2	2335.7
COAD_MET	1UW7FT	CD3	17.48	214.66	1607
COAD_MET	1UW7FT	CD68	71.81	321.02	1221.5
COAD_MET	1UW7FT	CD8	2.196	30.9	393.69
COAD_MET	1UW7FT	Foxp3	1.02	9.136	13.18
COAD_MET	1UW7FT	PD1	0	0	6.276
COAD_MET	1VNNZ3	CD163	114.4	125.36	1335.6
COAD_MET	1VNNZ3	CD3	6.307	146.88	2159.5
COAD_MET	1VNNZ3	CD68	29.74	271.45	999.42
COAD_MET	1VNNZ3	CD8	577.11	418.58	1100
COAD_MET	1VNNZ3	Foxp3	5.578	6.444	27.55
COAD_MET	1VNNZ3	PD1	0	0	3.235
COAD_MET	BZXONL	CD163	20.3	69.9	124.71
COAD_MET	BZXONL	CD3	14.26	51.51	163.68
COAD_MET	BZXONL	CD68	32.44	91.86	124.72
COAD_MET	BZXONL	CD8	8.013	28.15	148.98
COAD_MET	BZXONL	Foxp3	1.821	11.16	18.05
COAD_MET	BZXONL	PD1	0	0.4045	0
COAD_MET	GNEY4A	CD163	416.25	1094.5	1227.4
COAD_MET	GNEY4A	CD3	502.09	1402.3	2102.7
COAD_MET	GNEY4A	CD68	323.33	549.24	819.18
COAD_MET	GNEY4A	CD8	261.68	608.61	1473.5
COAD_MET	GNEY4A	Foxp3	120.46	104.89	114.07
COAD_MET	GNEY4A	PD1	4.915	26.1	28.61
COAD_MET	IR13ZE	CD163	34.72	480.29	2367.1
COAD_MET	IR13ZE	CD3	2.414	256.65	686.71
COAD_MET	IR13ZE	CD68	93.43	347.57	779.08
COAD_MET	IR13ZE	CD8	2.073	5.967	193.51
COAD_MET	IR13ZE	Foxp3	7.872	24.62	13.78
COAD_MET	IR13ZE	PD1	0	4.641	1.469
COAD_MET	J5Z6D9	CD163	180.6	713.03	2135.4
COAD_MET	J5Z6D9	CD3	7.706	64.35	407.09
COAD_MET	J5Z6D9	CD68	966.78	773.49	953.63
COAD_MET	J5Z6D9	CD8	49.23	159.08	465.64
COAD_MET	J5Z6D9	Foxp3	19.61	33.85	18.51
COAD_MET	J5Z6D9	PD1	4.562	15.5	6.899
COAD_MET	QNYVRC	CD163	250.71	305.13	2382.6
COAD_MET	QNYVRC	CD3	37.47	59.75	916.02
COAD_MET	QNYVRC	CD68	2.493	94.44	522.92
COAD_MET	QNYVRC	CD8	29.59	115.74	369.02
COAD_MET	QNYVRC	Foxp3	2.68	3.402	42.66
COAD_MET	QNYVRC	PD1	5.086	4.167	44.17
COAD_MET	UMM_1832c255	CD163	37.3	29.35	798.29
COAD_MET	UMM_1832c255	CD3	284.47	199.97	735.04
COAD_MET	UMM_1832c255	PD1	0	0	0.5301
COAD_MET	UMM_7d6f5a71	CD163	36.77	38.34	1173.7
COAD_MET	UMM_7d6f5a71	CD3	61.28	52.58	493.66
COAD_MET	UMM_99f5d619	CD163	36.67	34.84	259.19
COAD_MET	UMM_99f5d619	CD3	8.116	61.42	757.91
COAD_MET	UMM_99f5d619	PD1	0	0	18.11
COAD_MET	UMM_ce16327d	CD163	25.8	58.92	217.34
COAD_MET	UMM_ce16327d	CD3	214.36	66.96	220.81
COAD_MET	UMM_ce16327d	CD8	13	14.02	48.75
COAD_MET	UMM_ce16327d	PD1	0	0	0
COAD_MET	UMM_e797f78e	CD163	751.69	590.72	991.52
COAD_MET	UMM_e797f78e	CD3	1730.1	1110.4	1899
COAD_MET	UMM_e797f78e	CD8	359.16	257.35	551.78
COAD_MET	UMM_f946889d	CD163	129.88	416.48	1015.6
COAD_MET	UMM_f946889d	CD3	7.544	108.6	507.69
COAD_MET	UMM_f946889d	CD8	4.289	56.89	152.24
COAD_MET	UMM_f946889d	PD1	0	0.6322	0
COAD_PRI	16HJHG	CD163	167.64	96.59	499.07
COAD_PRI	16HJHG	CD3	244.68	368.12	1383.7
COAD_PRI	16HJHG	CD68	48.97	109.84	264.04
COAD_PRI	16HJHG	CD8	152.66	178.28	970.2
COAD_PRI	16HJHG	Foxp3	9.271	23.24	59.73
COAD_PRI	16HJHG	PD1	0	1.042	0
COAD_PRI	16TIQY	CD163	97.72	190.65	1281.8
COAD_PRI	16TIQY	CD3	105.4	243.37	2877.1
COAD_PRI	16TIQY	CD68	64.58	324	219.14
COAD_PRI	16TIQY	CD8	134.53	216.19	828.48
COAD_PRI	16TIQY	Foxp3	15	28.92	118.83
COAD_PRI	16TIQY	PD1	42.94	46.84	214.75
COAD_PRI	18YP5I	CD163	0	1.807	123.6
COAD_PRI	18YP5I	CD3	18.52	142.98	520.11
COAD_PRI	18YP5I	CD68	12.12	259.29	852.15
COAD_PRI	18YP5I	CD8	21.87	34.8	378.7
COAD_PRI	18YP5I	Foxp3	78.59	127.06	304.49
COAD_PRI	18YP5I	PD1	2.78	5.724	10.08
COAD_PRI	1FJEXB	CD163	108.19	108.14	1204.1
COAD_PRI	1FJEXB	CD3	180.22	356.85	1431.3
COAD_PRI	1FJEXB	CD68	202.45	502.55	802.7
COAD_PRI	1FJEXB	CD8	72.54	132.32	638.24
COAD_PRI	1FJEXB	Foxp3	236.02	113.56	460.79
COAD_PRI	1FJEXB	PD1	4.288	8.681	10.38
COAD_PRI	1FKYL9	CD163	26.63	139.7	233.59
COAD_PRI	1FKYL9	CD3	84.78	249.68	547.62
COAD_PRI	1FKYL9	CD68	78.37	104.35	273.74
COAD_PRI	1FKYL9	CD8	38.88	248.55	191.61
COAD_PRI	1FKYL9	Foxp3	35.85	8.366	17.94
COAD_PRI	1FKYL9	PD1	0	8.147	3.782
COAD_PRI	1OKS15	CD163	354.86	514.14	1869.3
COAD_PRI	1OKS15	CD3	804.73	585.36	1584.8
COAD_PRI	1OKS15	CD68	437.82	477.41	1668.9
COAD_PRI	1OKS15	CD8	158.13	177.77	627.17
COAD_PRI	1OKS15	Foxp3	290.78	213.94	295.36
COAD_PRI	1OKS15	PD1	14.51	29.85	124.13
COAD_PRI	1PUGA6	CD163	162.86	541.35	794.75
COAD_PRI	1PUGA6	CD3	36.71	183.74	570.98
COAD_PRI	1PUGA6	CD68	62.37	116.95	235.94
COAD_PRI	1PUGA6	CD8	53.89	20.22	59.96
COAD_PRI	1PUGA6	Foxp3	33.52	3.39	14.83
COAD_PRI	1PUGA6	PD1	0	0.5917	28.45
COAD_PRI	1SQOOP	CD163	7.908	136.28	783.94
COAD_PRI	1SQOOP	CD3	76.57	226.49	1090.4
COAD_PRI	1SQOOP	CD68	542.47	1556.1	540.16
COAD_PRI	1SQOOP	CD8	53.11	102.52	282.04
COAD_PRI	1SQOOP	Foxp3	30.03	50.58	200.49
COAD_PRI	1SQOOP	PD1	5.068	2.235	8.232
COAD_PRI	22F7YQ	CD163	160.04	387.57	1845
COAD_PRI	22F7YQ	CD3	854.52	130.04	1462.1
COAD_PRI	22F7YQ	CD68	203.88	641.33	2523.9
COAD_PRI	22F7YQ	CD8	391.54	521.09	1674.1
COAD_PRI	22F7YQ	Foxp3	134.32	52.59	125.99
COAD_PRI	22F7YQ	PD1	27.68	0.5512	6.607
COAD_PRI	5QYVXU	CD163	119.03	179.87	479.76
COAD_PRI	5QYVXU	CD3	175.72	701.68	648.92
COAD_PRI	5QYVXU	CD68	735.62	1074.2	377.37
COAD_PRI	5QYVXU	CD8	266	528.46	346.01
COAD_PRI	5QYVXU	Foxp3	29.85	20.35	56.57
COAD_PRI	5QYVXU	PD1	9.903	35.52	11.36
COAD_PRI	89JMQQ	CD163	263	169.51	328.23
COAD_PRI	89JMQQ	CD3	3.755	130.72	583.61
COAD_PRI	89JMQQ	CD68	106.68	278.56	360.12
COAD_PRI	89JMQQ	CD8	87.94	58	47.61
COAD_PRI	89JMQQ	Foxp3	32.1	3.028	7.37
COAD_PRI	89JMQQ	PD1	6.003	1.576	0
COAD_PRI	CQ0B9K	CD163	690.25	674.87	1168
COAD_PRI	CQ0B9K	CD3	646.53	555.33	510.13
COAD_PRI	CQ0B9K	CD68	316.95	228.06	309.44
COAD_PRI	CQ0B9K	CD8	439.85	269.37	620.26
COAD_PRI	CQ0B9K	Foxp3	106.09	164.54	194.48
COAD_PRI	CQ0B9K	PD1	20.77	26.68	41.79
COAD_PRI	LH673K	CD163	105.84	691.38	856.9
COAD_PRI	LH673K	CD3	15.73	234.91	193.48
COAD_PRI	LH673K	CD68	161.86	761.85	507.9
COAD_PRI	LH673K	CD8	21.25	132.35	178.25
COAD_PRI	LH673K	Foxp3	33.78	82.79	69.5
COAD_PRI	LH673K	PD1	0.5989	15.7	15.18
COAD_PRI	S2GCL5	CD163	415.23	170.67	552.61
COAD_PRI	S2GCL5	CD3	5.396	100.33	354.14
COAD_PRI	S2GCL5	CD68	335.23	513.34	1206
COAD_PRI	S2GCL5	CD8	117.08	31.59	213.89
COAD_PRI	S2GCL5	Foxp3	35.23	66.15	141.5
COAD_PRI	S2GCL5	PD1	1.593	0	5.802
COAD_PRI	UMM_17b7a9a0	CD163	458.16	562.32	1090.2
COAD_PRI	UMM_17b7a9a0	CD3	941.15	1148.2	1157.6
COAD_PRI	UMM_17b7a9a0	CD8	1024.4	1844.4	948.66
COAD_PRI	UMM_17b7a9a0	PD1	4.881	1.035	0
COAD_PRI	UMM_24d9a857	CD163	455.03	404.84	317.24
COAD_PRI	UMM_24d9a857	CD3	85.27	121.76	90.61
COAD_PRI	UMM_24d9a857	CD8	22.46	86.41	55.66
COAD_PRI	UMM_24d9a857	PD1	1.163	0.7061	0
COAD_PRI	UMM_32bd2faa	CD163	225.85	439.44	519.87
COAD_PRI	UMM_32bd2faa	CD3	146.07	283.67	558.43
COAD_PRI	UMM_32bd2faa	CD8	128.19	58.3	152.91
COAD_PRI	UMM_32bd2faa	PD1	1.459	0.3907	21.69
COAD_PRI	UMM_33ffc672	CD163	189.32	341.95	510.53
COAD_PRI	UMM_33ffc672	CD3	123.93	103.74	284.75
COAD_PRI	UMM_33ffc672	CD8	90.56	59.23	196.05
COAD_PRI	UMM_33ffc672	PD1	2.369	0	2.627
COAD_PRI	UMM_484bcb35	CD163	283.03	545.25	742.64
COAD_PRI	UMM_484bcb35	CD3	125.77	242.3	448.93
COAD_PRI	UMM_484bcb35	CD8	24.97	63.61	90.61
COAD_PRI	UMM_584aaa48	CD3	331.31	315.11	1039.9
COAD_PRI	UMM_584aaa48	CD8	76.42	109.56	431.62
COAD_PRI	UMM_6f697b0e	CD163	288.09	629.19	1284.9
COAD_PRI	UMM_6f697b0e	CD3	35.04	152.47	415.04
COAD_PRI	UMM_6f697b0e	PD1	3.213	4.569	0.8533
COAD_PRI	UMM_74f799d9	CD163	226.42	88.97	710.42
COAD_PRI	UMM_74f799d9	PD1	1.391	0.6545	1.865
COAD_PRI	UMM_7f7b0bef	CD163	1192.5	977.61	1006.9
COAD_PRI	UMM_7f7b0bef	CD3	2862.5	3318.3	2186.9
COAD_PRI	UMM_7f7b0bef	CD8	1444.7	1288.7	1211.5
COAD_PRI	UMM_7f7b0bef	PD1	4.248	2.846	2.62
COAD_PRI	UMM_886143ae	CD163	927.73	1440	1042.7
COAD_PRI	UMM_886143ae	CD3	1107	1220.1	1155.9
COAD_PRI	UMM_886143ae	CD8	748.25	967.66	634.73
COAD_PRI	UMM_886143ae	PD1	0	0.6376	1.183
COAD_PRI	UMM_98baf3c1	CD3	107.97	136.65	470.79
COAD_PRI	UMM_98baf3c1	PD1	0.6883	0.7812	0
COAD_PRI	UMM_b1561748	CD3	50.43	72.04	514.82
COAD_PRI	UMM_b1ae4dc7	CD8	373.95	179.03	176.74
COAD_PRI	UMM_c3d6a7df	CD163	362	747.46	1701.5
COAD_PRI	UMM_c3d6a7df	CD3	168.09	342.55	1600.6
COAD_PRI	UMM_c3d6a7df	CD8	60.7	162.05	950.77
COAD_PRI	UMM_c3d6a7df	PD1	19.46	13.74	6.044
COAD_PRI	UMM_dcfb98e1	CD3	52.58	97.24	759.36
COAD_PRI	UMM_dcfb98e1	PD1	0	0.799	0
COAD_PRI	X1E6XI	CD163	668.33	735.35	563.63
COAD_PRI	X1E6XI	CD3	565.81	1127.3	799.46
COAD_PRI	X1E6XI	CD68	179.21	926.45	1372.4
COAD_PRI	X1E6XI	CD8	311.53	1139	1475.5
COAD_PRI	X1E6XI	Foxp3	277.58	321.65	382.89
COAD_PRI	X1E6XI	PD1	14.06	19.46	3.158
ESCA	1N9HHG	CD163	40.62	140.54	147.3
ESCA	1N9HHG	CD3	10	52.84	34.46
ESCA	1N9HHG	CD68	94.56	3.11	10.43
ESCA	1N9HHG	CD8	8.397	37.61	55.18
ESCA	1N9HHG	Foxp3	15.18	11.17	24.8
ESCA	1N9HHG	PD1	5.034	7.771	3.284
ESCA	1NW5ZW	CD163	117.47	852.41	1306
ESCA	1NW5ZW	CD3	37.83	83.91	202.9
ESCA	1NW5ZW	CD68	306.53	797.54	758.14
ESCA	1NW5ZW	CD8	21.2	105.78	581.02
ESCA	1NW5ZW	Foxp3	13.52	6.048	16.92
ESCA	1NW5ZW	PD1	0.4758	0.2798	0.4749
ESCA	1O3LD4	CD163	31.63	273.02	681.14
ESCA	1O3LD4	CD3	26.3	51.45	149.39
ESCA	1O3LD4	CD68	97.97	240.4	472.7
ESCA	1O3LD4	CD8	35.04	43.2	191.04
ESCA	1O3LD4	Foxp3	36.33	62.22	75.13
ESCA	1O3LD4	PD1	0	9.799	12.86
ESCA	1d4774	CD163	105.84	362.5	949.55
ESCA	1d4774	CD3	11.46	11.45	1021
ESCA	1d4774	CD68	104.07	252.13	361.73
ESCA	1d4774	CD8	64.87	50.65	178.57
ESCA	1d4774	Foxp3	96.15	160.1	377.38
ESCA	1d4774	PD1	0	0	0
ESCA	225873	CD163	251.07	460.32	742.91
ESCA	225873	CD3	56.21	125.17	293.26
ESCA	225873	CD68	96.69	176.49	394.39
ESCA	225873	CD8	205.54	134.16	157.12
ESCA	225873	Foxp3	500.63	625.77	1147.5
ESCA	225873	PD1	17.05	32.6	70.97
ESCA	241ba2	CD163	534.31	929.06	1148.6
ESCA	241ba2	CD3	33.01	144.18	226.07
ESCA	241ba2	CD68	703.73	1178.6	847.51
ESCA	241ba2	CD8	58.6	350.04	361.74
ESCA	241ba2	Foxp3	50.87	96.39	87.66
ESCA	241ba2	PD1	2.5	3.805	1.687
ESCA	3b4a7f	CD163	806.97	351.89	577.33
ESCA	3b4a7f	CD3	833.79	807.81	750.43
ESCA	3b4a7f	CD68	230.93	273.42	144.08
ESCA	3b4a7f	CD8	548.33	314.75	396.19
ESCA	3b4a7f	Foxp3	388.31	84.99	446.06
ESCA	3b4a7f	PD1	66.53	50.55	8.809
ESCA	3e2059	CD163	118.91	422.01	790.62
ESCA	3e2059	CD3	65.19	174.61	574.14
ESCA	3e2059	CD68	390.87	298.14	977.84
ESCA	3e2059	CD8	245.67	243.43	515.29
ESCA	3e2059	Foxp3	150.69	143.11	204.39
ESCA	3e2059	PD1	3.106	6.348	8.431
ESCA	4fdf06	CD163	234.87	317.19	632.29
ESCA	4fdf06	CD3	105.79	93.33	54.5
ESCA	4fdf06	CD68	5.054	18.68	73.97
ESCA	4fdf06	CD8	51.49	72.49	467.08
ESCA	4fdf06	Foxp3	8.98	15.74	72.24
ESCA	4fdf06	PD1	0.8963	0.2282	50.82
ESCA	54f26b	CD163	135.19	133.3	258.6
ESCA	54f26b	CD3	43.77	31.64	53.84
ESCA	54f26b	CD68	44.72	69.42	115.06
ESCA	54f26b	CD8	494.14	293.27	390.75
ESCA	54f26b	Foxp3	7.174	20.97	50.99
ESCA	54f26b	PD1	2.727	2.889	8.239
ESCA	7FNAI7	CD163	253.61	883.24	524.57
ESCA	7FNAI7	CD3	62.35	182.21	273.7
ESCA	7FNAI7	CD68	255.46	602.25	799.66
ESCA	7FNAI7	CD8	101.27	224.45	356.24
ESCA	7FNAI7	Foxp3	529.71	240.26	97.27
ESCA	7FNAI7	PD1	0	2.57	5.446
ESCA	7f2f37	CD163	12.48	92.62	393.81
ESCA	7f2f37	CD3	9.206	5.609	15.57
ESCA	7f2f37	CD68	0	6.242	10.62
ESCA	7f2f37	CD8	205.12	144.15	148.73
ESCA	7f2f37	Foxp3	6.34	9.621	19.24
ESCA	7f2f37	PD1	0	0.2767	1.75
ESCA	A9SYCW	CD163	298.8	237.16	1191.8
ESCA	A9SYCW	CD3	86.83	34.93	517.85
ESCA	A9SYCW	CD68	211.15	143.52	497.4
ESCA	A9SYCW	CD8	16.83	241.73	512.31
ESCA	A9SYCW	Foxp3	87.09	302.9	200.22
ESCA	A9SYCW	PD1	4.499	0	17.39
ESCA	PEOTC5	CD163	968.05	881.57	1779.5
ESCA	PEOTC5	CD3	669.86	545.41	1463.3
ESCA	PEOTC5	CD68	850.67	1044.8	1480.6
ESCA	PEOTC5	CD8	348.97	502.06	984.36
ESCA	PEOTC5	Foxp3	94.88	148.97	107.45
ESCA	PEOTC5	PD1	12.7	67.26	41.93
ESCA	VT1BNG	CD163	719.14	839.93	1267.5
ESCA	VT1BNG	CD3	3.073	51.37	173.96
ESCA	VT1BNG	CD68	335.7	227.54	570.93
ESCA	VT1BNG	CD8	28.91	14.02	44.82
ESCA	VT1BNG	Foxp3	8.192	22.56	53.45
ESCA	VT1BNG	PD1	0	0	0
ESCA	W1RNGR	CD163	806.2	738.6	272.39
ESCA	W1RNGR	CD3	278.68	289.76	1983.5
ESCA	W1RNGR	CD68	807.74	671.95	636.49
ESCA	W1RNGR	CD8	919.61	1291.8	790.66
ESCA	W1RNGR	Foxp3	171.22	248.19	566.58
ESCA	W1RNGR	PD1	155.78	70.89	14.08
ESCA	d301b6	CD163	1249.9	838.62	779.21
ESCA	d301b6	CD3	666.41	298.69	180.21
ESCA	d301b6	CD68	166.03	139.16	24.07
ESCA	d301b6	CD8	238.05	158.14	208.02
ESCA	d301b6	Foxp3	82.13	49.26	21.12
ESCA	d301b6	PD1	0.3544	0	0
ESCA	edd1e8	CD163	392.24	480.77	652.21
ESCA	edd1e8	CD3	24.51	99.72	150.41
ESCA	edd1e8	CD68	178.11	356.56	531.35
ESCA	edd1e8	CD8	61.75	145.65	379.22
ESCA	edd1e8	Foxp3	9.146	31.85	42.27
ESCA	edd1e8	PD1	0	0.4155	103.29
HNSC	133X1T	CD163	83.75	240.58	639.6
HNSC	133X1T	CD3	217.07	372.59	2555.3
HNSC	133X1T	CD68	333.52	319.4	641.68
HNSC	133X1T	CD8	527.13	414.75	525.02
HNSC	133X1T	Foxp3	462.48	300.61	364.77
HNSC	133X1T	PD1	1.575	2.323	25.35
HNSC	1EGVJF	CD163	848.8	789.72	1737.5
HNSC	1EGVJF	CD3	1114.1	1590.9	3631.5
HNSC	1EGVJF	CD68	663.06	1053.3	744.47
HNSC	1EGVJF	CD8	416.37	1090.9	2306.3
HNSC	1EGVJF	Foxp3	508.28	225.39	190.29
HNSC	1EGVJF	PD1	122.22	172.42	643.5
HNSC	1GMA0Q	CD163	2174.8	3133.4	1740.7
HNSC	1GMA0Q	CD3	3340.2	5934.3	1327.7
HNSC	1GMA0Q	CD68	794.89	876.62	966.01
HNSC	1GMA0Q	CD8	2420.1	4380	389.92
HNSC	1GMA0Q	Foxp3	1083.4	1084.8	310.94
HNSC	1GMA0Q	PD1	21.36	171.15	99.36
HNSC	1J2RON	CD163	486.04	368.81	1344.8
HNSC	1J2RON	CD3	605.3	857.05	1289.2
HNSC	1J2RON	CD68	195.19	1365.9	2386.8
HNSC	1J2RON	CD8	245.92	180.01	397.45
HNSC	1J2RON	Foxp3	638.3	477.24	465.65
HNSC	1J2RON	PD1	154.2	136.35	202.14
HNSC	1OUYL2	CD163	467.61	1073.6	2033
HNSC	1OUYL2	CD3	255.49	490.92	1711.1
HNSC	1OUYL2	CD68	604.07	641.1	1831.7
HNSC	1OUYL2	CD8	331.13	436.08	822.65
HNSC	1OUYL2	Foxp3	228.96	246.07	379.51
HNSC	1OUYL2	PD1	5.31	6.265	83.57
HNSC	1X37FA	CD163	251.92	348.07	1422.9
HNSC	1X37FA	CD3	238.53	342.69	1715.3
HNSC	1X37FA	CD68	225.26	292.01	1202.5
HNSC	1X37FA	CD8	185.47	380.54	911.49
HNSC	1X37FA	Foxp3	107.37	258	262.02
HNSC	1X37FA	PD1	36.1	37.81	202.95
HNSC	1YC9ZE	CD163	692.54	820.31	1279.5
HNSC	1YC9ZE	CD3	278.25	377.94	1073.5
HNSC	1YC9ZE	CD68	142.87	724.62	628.06
HNSC	1YC9ZE	CD8	103.51	326.67	453.18
HNSC	1YC9ZE	Foxp3	50.16	49.52	32.89
HNSC	1YC9ZE	PD1	0	0	0
HNSC	5LUP00	CD163	205.22	451.33	1176.7
HNSC	5LUP00	CD3	262.22	267.21	437.7
HNSC	5LUP00	CD68	825.07	742.53	765.92
HNSC	5LUP00	CD8	91.72	96.64	114.45
HNSC	5LUP00	Foxp3	139.69	157.39	189.77
HNSC	5LUP00	PD1	21.91	9.285	31.1
HNSC	85XE3X	CD163	201.63	447.08	1515.7
HNSC	85XE3X	CD3	69.13	151.18	1659
HNSC	85XE3X	CD68	457.79	308.1	1019.7
HNSC	85XE3X	CD8	141.32	252.51	1359.5
HNSC	85XE3X	Foxp3	120.54	154.1	291.38
HNSC	85XE3X	PD1	3.01	8.156	63.4
HNSC	AGGKZI	CD163	538.35	741.42	1007.8
HNSC	AGGKZI	CD3	459.34	1011.1	2068.8
HNSC	AGGKZI	CD68	235.01	355.03	311.26
HNSC	AGGKZI	CD8	62.67	519.77	705.74
HNSC	AGGKZI	Foxp3	249.52	485.58	663.08
HNSC	AGGKZI	PD1	35.18	10.71	97.19
HNSC	C49HS5	CD163	456.8	624.91	591.78
HNSC	C49HS5	CD3	565.39	495.48	589.63
HNSC	C49HS5	CD68	26.13	54.8	347.61
HNSC	C49HS5	CD8	296.91	206.88	292.86
HNSC	C49HS5	Foxp3	897.87	467.37	185.97
HNSC	C49HS5	PD1	18.68	9.522	12.13
HNSC	L89QE3	CD163	521.69	548.98	964.62
HNSC	L89QE3	CD3	543.89	343.85	464.34
HNSC	L89QE3	CD68	338.58	225.68	268.59
HNSC	L89QE3	CD8	509.89	1051.3	278.57
HNSC	L89QE3	Foxp3	612.68	602.95	153.59
HNSC	L89QE3	PD1	13.43	11.57	5.083
HNSC	VBWFBW	CD163	51.24	97.11	1432.4
HNSC	VBWFBW	CD3	142.27	200.05	1318.7
HNSC	VBWFBW	CD68	2.226	8.906	117.52
HNSC	VBWFBW	CD8	31.24	188.87	715.5
HNSC	VBWFBW	Foxp3	243.31	278.72	238.57
HNSC	VBWFBW	PD1	2.791	3.804	6.448
HNSC	XCTHWP	CD163	377.77	732.6	1470.1
HNSC	XCTHWP	CD3	577.37	366.97	1469.2
HNSC	XCTHWP	CD68	1169.5	1254.4	1857.6
HNSC	XCTHWP	CD8	205.82	536.01	736.45
HNSC	XCTHWP	Foxp3	192.8	754.4	751.34
HNSC	XCTHWP	PD1	71.38	99.48	106.56
HNSC	XYSFDT	CD163	224.68	390.72	2275.4
HNSC	XYSFDT	CD3	33.7	194.7	977.79
HNSC	XYSFDT	CD68	290.26	326.1	718.94
HNSC	XYSFDT	CD8	298.42	326.82	805.25
HNSC	XYSFDT	Foxp3	40.35	160.62	170.99
HNSC	XYSFDT	PD1	85.58	54.23	110.69
LUAD	11XRA1	CD163	874.64	848.46	1758.3
LUAD	11XRA1	CD3	635.11	799.85	1826.3
LUAD	11XRA1	CD68	807.95	1260.1	1213.3
LUAD	11XRA1	CD8	446.71	492.57	711.82
LUAD	11XRA1	Foxp3	112.11	102.65	162.96
LUAD	11XRA1	PD1	118.41	197.93	404.23
LUAD	1EMYI1	CD163	194.38	257.97	451.33
LUAD	1EMYI1	CD3	330.22	907.8	3548.1
LUAD	1EMYI1	CD68	386.81	576.83	744.31
LUAD	1EMYI1	CD8	339.19	520.87	1466.7
LUAD	1EMYI1	Foxp3	89.39	226.86	345.4
LUAD	1EMYI1	PD1	7.1	13.37	16.34
LUAD	1FPKWN	CD163	219.8	498.98	1521.2
LUAD	1FPKWN	CD3	449.31	943.88	3525
LUAD	1FPKWN	CD68	717.56	833.89	1762.7
LUAD	1FPKWN	CD8	381.38	760.7	2063.8
LUAD	1FPKWN	Foxp3	86.14	184.02	361.29
LUAD	1FPKWN	PD1	18.67	9.763	121.37
LUAD	1G6HGJ	CD163	842.71	913.85	940.64
LUAD	1G6HGJ	CD3	524.63	915.19	2802.1
LUAD	1G6HGJ	CD68	932.53	1080.4	1560.7
LUAD	1G6HGJ	CD8	384.19	634.21	2887.6
LUAD	1G6HGJ	Foxp3	41.95	73.13	364.61
LUAD	1G6HGJ	PD1	0.8183	4.168	209.62
LUAD	1MNSKT	CD163	811.94	948.27	666.48
LUAD	1MNSKT	CD3	1966.9	4424.8	2618.8
LUAD	1MNSKT	CD68	1060.3	1602.6	474.95
LUAD	1MNSKT	CD8	198.55	929.37	464.28
LUAD	1MNSKT	Foxp3	132.33	329.73	125.84
LUAD	1MNSKT	PD1	9.807	47.51	8.236
LUAD	A3W7UK	CD163	186.69	186.64	345.92
LUAD	A3W7UK	CD3	109.97	270.2	1638.4
LUAD	A3W7UK	CD68	91.98	42.49	152.35
LUAD	A3W7UK	CD8	163.74	44.08	346.18
LUAD	A3W7UK	Foxp3	0.6793	23.29	85.81
LUAD	A3W7UK	PD1	0.7645	1.332	28.49
LUAD	RDVNQR	CD163	332.68	298.62	952.48
LUAD	RDVNQR	CD3	269.9	435.06	1350.2
LUAD	RDVNQR	CD68	33.24	106.44	268.5
LUAD	RDVNQR	CD8	281.79	328.7	1206.6
LUAD	RDVNQR	Foxp3	1.683	22.72	126.37
LUAD	RDVNQR	PD1	4.66	25.62	31.43
LUAD	UC1DE4	CD163	1678.8	1195.9	303.43
LUAD	UC1DE4	CD3	829.32	2586.2	1146.9
LUAD	UC1DE4	CD68	3161.4	1925.9	463.61
LUAD	UC1DE4	CD8	1407.8	1971	1074.4
LUAD	UC1DE4	Foxp3	458.29	700.17	201.36
LUAD	UC1DE4	PD1	54.27	54.51	15.27
LUAD	V5KN6L	CD163	1010.1	1432.6	2473
LUAD	V5KN6L	CD3	630.48	1523.1	5730.2
LUAD	V5KN6L	CD68	2160.8	2092.6	3347.4
LUAD	V5KN6L	CD8	168.55	543.16	1745
LUAD	V5KN6L	Foxp3	127.21	244.82	426.52
LUAD	V5KN6L	PD1	4.785	19.63	19.41
LUAD	VJ0S68	CD163	330.61	280.78	997.31
LUAD	VJ0S68	CD3	389.82	781.3	2372.9
LUAD	VJ0S68	CD68	423.52	959.73	1437.4
LUAD	VJ0S68	CD8	692.1	1451.5	1315.5
LUAD	VJ0S68	Foxp3	12	73.01	58.42
LUAD	VJ0S68	PD1	6.276	10.46	35.17
LUSC	1GZGV4	CD163	545.76	749.45	759.09
LUSC	1GZGV4	CD3	354.26	354.23	542.76
LUSC	1GZGV4	CD68	250.73	210.54	159.72
LUSC	1GZGV4	CD8	196.87	120.41	344.36
LUSC	1GZGV4	Foxp3	138.53	193.79	221.41
LUSC	1GZGV4	PD1	8.651	0.8713	0.7411
LUSC	1KR4OR	CD163	213.94	317.34	1034.9
LUSC	1KR4OR	CD3	4.937	63.73	182.35
LUSC	1KR4OR	CD68	126.82	237.45	363.38
LUSC	1KR4OR	CD8	4.824	49.04	271.02
LUSC	1KR4OR	Foxp3	62.36	17.86	45.65
LUSC	1KR4OR	PD1	0	21.71	0.8023
LUSC	1Q3J1X	CD163	945.38	770.36	236.85
LUSC	1Q3J1X	CD3	722.64	633.72	62.85
LUSC	1Q3J1X	CD68	444.33	176.09	61.72
LUSC	1Q3J1X	CD8	621.1	1117.4	269.3
LUSC	1Q3J1X	Foxp3	53.33	22.94	2.509
LUSC	1Q3J1X	PD1	28.32	42.01	0.8334
LUSC	1S86B0	CD163	894.19	856.67	1443.2
LUSC	1S86B0	CD3	597.6	355.36	1139.4
LUSC	1S86B0	CD68	309.49	440.33	590.84
LUSC	1S86B0	CD8	256.71	253.96	545.77
LUSC	1S86B0	Foxp3	76.25	213.65	362.66
LUSC	1S86B0	PD1	34.92	17.08	6.106
LUSC	1X121R	CD163	974.71	474.32	1074.6
LUSC	1X121R	CD3	462.12	370.17	1068.5
LUSC	1X121R	CD68	68.46	152.3	163.49
LUSC	1X121R	CD8	384.21	372.56	814.2
LUSC	1X121R	Foxp3	139.85	68.92	68.08
LUSC	1X121R	PD1	17.28	17.74	29.54
LUSC	93BJXW	CD163	323.5	658.2	1468.4
LUSC	93BJXW	CD3	168.71	267.38	1827.6
LUSC	93BJXW	CD68	295.24	697.55	643.33
LUSC	93BJXW	CD8	447.76	795.02	1690.5
LUSC	93BJXW	Foxp3	17.47	46.31	71.97
LUSC	93BJXW	PD1	2.463	21.16	65.12
LUSC	AOZLFT	CD163	503.39	329.49	848.75
LUSC	AOZLFT	CD3	786.71	708.14	2120.8
LUSC	AOZLFT	CD68	424.13	413.26	1331.2
LUSC	AOZLFT	CD8	130.73	38.27	214.1
LUSC	AOZLFT	Foxp3	46.37	12.35	24.93
LUSC	AOZLFT	PD1	21.46	5.846	2.8
LUSC	CQDWTK	CD163	588.5	784.13	1042.3
LUSC	CQDWTK	CD3	310.78	627	1418.5
LUSC	CQDWTK	CD68	26.98	21.57	33.25
LUSC	CQDWTK	CD8	32.84	21.67	16.24
LUSC	CQDWTK	Foxp3	1.418	0	0
LUSC	CQDWTK	PD1	15.67	42.03	61.56
LUSC	S1L5O6	CD163	100.8	304.69	1035.6
LUSC	S1L5O6	CD3	123.35	385.76	1232.6
LUSC	S1L5O6	CD68	199.52	469.29	713.37
LUSC	S1L5O6	CD8	22.32	93.13	836.12
LUSC	S1L5O6	Foxp3	16.12	43.18	110.43
LUSC	S1L5O6	PD1	4.975	7.905	511.17
LUSC	SRVR2F	CD163	525.16	666.88	523.72
LUSC	SRVR2F	CD3	352.52	199.28	581.34
LUSC	SRVR2F	CD68	677.19	436.76	413.16
LUSC	SRVR2F	CD8	1156.4	831.42	1121.2
LUSC	SRVR2F	Foxp3	26.46	28.15	143.47
LUSC	SRVR2F	PD1	44.18	38.51	8.958
MEL	10010	CD163	571.53	2256.3	728.43
MEL	10010	CD3	3229.8	3832.3	915.55
MEL	10010	CD68	1020.9	937.11	11.6
MEL	10010	CD8	881.15	2337.9	478.72
MEL	10010	Foxp3	162.87	356.13	197.56
MEL	10010	PD1	12.18	19.7	35.86
MEL	13359	CD163	912.06	982.31	353.02
MEL	13359	CD3	18.38	584.08	180.41
MEL	13359	CD68	28.44	49.16	9.8
MEL	13359	CD8	111.01	111.38	20.62
MEL	13359	Foxp3	26.18	205.02	33.71
MEL	13359	PD1	37.6	0	4.883
MEL	14842	CD163	1007.4	1711.6	736.53
MEL	14842	CD3	360.28	572.15	939.04
MEL	14842	CD68	2452.6	1658.9	166.46
MEL	14842	CD8	922.31	544.14	487.14
MEL	14842	Foxp3	128.12	36.13	2.46
MEL	14842	PD1	23.99	35.18	220.22
MEL	14917	CD163	245.85	442.96	1418.3
MEL	14917	CD3	95.61	157.37	2242.8
MEL	14917	CD68	780.01	1077.6	425.78
MEL	14917	CD8	887.36	2088.7	44.25
MEL	14917	Foxp3	55.59	51.54	91.34
MEL	14917	PD1	0	62.75	0
MEL	15368	CD163	382.6	503.61	669.7
MEL	15368	CD3	45.38	88.67	462.45
MEL	15368	CD68	525.32	1655.4	1242
MEL	15368	CD8	187.71	165.74	161.78
MEL	15368	Foxp3	49.37	30.57	12.93
MEL	15368	PD1	67.19	152.4	38.97
MEL	20989	CD163	242.61	25.92	254.66
MEL	20989	CD3	957.21	146.22	278.79
MEL	20989	CD68	400.36	604.73	32.95
MEL	20989	CD8	1461.4	104.17	28.4
MEL	20989	Foxp3	10.69	39.02	79.59
MEL	20989	PD1	0	0	0
MEL	26506	CD163	1359.2	1665.2	1004.3
MEL	26506	CD3	28.97	69.04	79.59
MEL	26506	CD68	1010.8	860.36	323.76
MEL	26506	CD8	14.31	200.29	265.99
MEL	26506	Foxp3	4.736	25.99	10.17
MEL	26506	PD1	0	0	19.75
MEL	31116	CD163	639.3	113.18	668.84
MEL	31116	CD3	7.193	486.11	3176
MEL	31116	CD68	359.85	90.81	129.85
MEL	31116	CD8	22.9	68.97	443.35
MEL	31116	Foxp3	40.81	375.37	1465.9
MEL	31116	PD1	4.658	0	0
MEL	361	CD163	1450.8	1896	1106
MEL	361	CD3	1382.9	4106.2	706.85
MEL	361	CD68	637.67	464.89	42.85
MEL	361	CD8	336.6	1098.7	36.27
MEL	361	Foxp3	22.96	308.99	117.73
MEL	361	PD1	8.892	32.66	33.02
MEL	3818	CD163	507.32	504.81	500.14
MEL	3818	CD3	1798.3	2398.5	278.25
MEL	3818	CD68	401.07	569.94	294.49
MEL	3818	CD8	1052.2	2705.4	230.94
MEL	3818	Foxp3	61.31	33.83	14.8
MEL	3818	PD1	69.67	160.2	55.51
MEL	5485	CD163	805.11	1189.4	403.95
MEL	5485	CD3	3617.4	6749.7	286.86
MEL	5485	CD68	205.57	244.37	51.45
MEL	5485	CD8	1208.7	1712.8	111.01
MEL	5485	Foxp3	733.46	1015.4	53.01
MEL	5485	PD1	172.04	98.19	6.943
MEL	7191	CD163	1120.4	923.82	356.08
MEL	7191	CD3	365.87	735.55	58.32
MEL	7191	CD68	46.94	67.74	2.94
MEL	7191	CD8	621.66	1407.7	0
MEL	7191	Foxp3	43.5	97.37	36.43
MEL	7191	PD1	65.17	312.32	15.14
MEL	75647	CD163	1410	1058	762.63
MEL	75647	CD3	4.273	37.69	1155.2
MEL	75647	CD68	316.85	700.55	456.44
MEL	75647	CD8	3.245	10.92	42.15
MEL	75647	Foxp3	51.45	141.5	348.65
MEL	75647	PD1	0	0	0
MEL	889	CD163	275.64	919.42	1126.5
MEL	889	CD3	65.15	445.9	184.43
MEL	889	CD68	365.43	1048.8	395.95
MEL	889	CD8	21.46	74.24	80.7
MEL	889	Foxp3	10.9	34.59	15.76
MEL	889	PD1	6.475	0	5.72
OV	1192000000000	CD163	230.47	271.09	380.55
OV	1192000000000	CD3	23.44	14.51	31.64
OV	1192000000000	CD68	0	13.08	1.06
OV	1192000000000	CD8	35.59	17.41	44.16
OV	1192000000000	Foxp3	23.91	2.059	5.675
OV	1192000000000	PD1	0	10.85	0
OV	249176	CD163	122.87	157.17	448.62
OV	249176	CD3	35.72	63.07	157.29
OV	249176	CD68	17.73	6.374	57.18
OV	249176	CD8	63.94	101.82	133.46
OV	249176	Foxp3	26.24	26.69	4.573
OV	249176	PD1	0	0	0
OV	36fadd	CD163	311.15	502.2	443.64
OV	36fadd	CD3	19.48	32.31	26.47
OV	36fadd	CD68	45.19	115.62	9.931
OV	36fadd	CD8	170.37	160.13	200.24
OV	36fadd	Foxp3	66.84	40.64	8.032
OV	36fadd	PD1	0	1.264	0
OV	6572ce	CD163	237.05	259.03	292.88
OV	6572ce	CD3	4.495	23.09	227.18
OV	6572ce	CD68	33.06	11.63	9.63
OV	6572ce	CD8	12.29	18.12	70.85
OV	6572ce	Foxp3	0	13.18	32.42
OV	6572ce	PD1	0	0	0
OV	77162a	CD163	205.46	265.67	410.28
OV	77162a	CD3	170.07	72.69	73.78
OV	77162a	CD68	25.5	17.13	56.03
OV	77162a	CD8	585.49	127.72	130.44
OV	77162a	Foxp3	5.551	8.805	3.534
OV	77162a	PD1	2.312	1.803	7.042
OV	Ovar028	CD163	2155.6	1689	3330.7
OV	Ovar028	CD3	679.12	1326.2	3982
OV	Ovar028	CD8	894.48	1530.3	2817.4
OV	Ovar037	CD163	2179.1	2216.2	986.82
OV	Ovar037	CD3	452.62	709.28	476.83
OV	Ovar037	CD8	1308.3	2532.1	900.31
OV	Ovar038A	CD163	606.39	837.31	1473.9
OV	Ovar038A	CD3	440.81	542.36	849.98
OV	Ovar038A	CD8	465.1	354.69	1098.7
OV	Ovar039A	CD163	1235.8	963.69	573.69
OV	Ovar039A	CD3	1043	1458.4	965.17
OV	Ovar039A	CD8	869.37	1227.1	753.48
OV	Ovar043	CD163	1735.3	1133.5	2099.2
OV	Ovar043	CD3	289.73	377.35	1205.4
OV	Ovar043	CD8	186.72	220.6	737.33
OV	Ovar045	CD163	65.95	495.66	1520.6
OV	Ovar045	CD3	88.52	243.69	1784.4
OV	Ovar045	CD8	125.61	318.49	1070.5
OV	Ovar047	CD163	750.08	759	598.11
OV	Ovar047	CD3	164.53	269.98	228.31
OV	Ovar047	CD8	14.17	29.3	20.65
OV	Ovar048	CD163	554.27	1198	672.71
OV	Ovar048	CD3	10.25	117.29	451.91
OV	Ovar048	CD8	51.81	144.06	809
OV	Ovar050	CD163	404.13	981.62	731.27
OV	Ovar050	CD3	443.9	422.2	391.92
OV	Ovar050	CD8	1268.3	815.25	1037
OV	Ovar052	CD163	694.73	457.39	415.06
OV	Ovar052	CD3	138.43	314.89	661.73
OV	Ovar052	CD8	357.81	265.31	134.12
OV	Ovar054	CD163	273.2	228.06	321.38
OV	Ovar054	CD3	233.51	376.5	153.47
OV	Ovar054	CD8	51.99	41.65	34.55
OV	bddb33	CD163	36.94	42.86	158.09
OV	bddb33	CD3	1.474	0.5925	8.377
OV	bddb33	CD68	25.54	7.177	2.553
OV	bddb33	CD8	34.77	4.421	221.88
OV	bddb33	Foxp3	1.128	2.634	2.685
OV	bddb33	PD1	0	0	0
OV	ceba04	CD163	19.18	33.82	399.18
OV	ceba04	CD3	11.82	0.8199	23.31
OV	ceba04	CD68	0	3.817	0
OV	ceba04	CD8	11.25	0	265.7
OV	ceba04	Foxp3	0	0	0
OV	ceba04	PD1	0	0	0
OV	d6d950	CD163	6.16	23.22	9.17
OV	d6d950	CD3	20.28	21.68	76.96
OV	d6d950	CD68	78.43	43.57	37.91
OV	d6d950	CD8	40.29	25.62	47.98
OV	d6d950	Foxp3	76.39	36.49	23.92
OV	d6d950	PD1	0	0	0
OV	de6d5a	CD163	41	5.286	38.57
OV	de6d5a	CD3	3.486	4.157	11.38
OV	de6d5a	CD68	0	1.266	1.582
OV	de6d5a	CD8	165.34	78.95	68.81
OV	de6d5a	Foxp3	0	1.46	1.347
OV	de6d5a	PD1	0	2.082	0
OV	ea27ff	CD163	117.04	61.63	203.52
OV	ea27ff	CD3	0	3.002	47.86
OV	ea27ff	CD68	30.55	23.49	84.82
OV	ea27ff	CD8	19.43	11.28	104.86
OV	ea27ff	Foxp3	2.508	5.238	1.974
OV	ea27ff	PD1	0	0	0
OV	f432fa	CD163	594.12	707.63	542.64
OV	f432fa	CD3	5.645	69.4	270.21
OV	f432fa	CD68	3.285	1.885	24.74
OV	f432fa	CD8	338.51	550.46	315.03
OV	f432fa	Foxp3	27.04	54.1	15.17
OV	f432fa	PD1	0	2.29	4.192
STAD	1122cd	CD3	35.48	132.37	533.6
STAD	1122cd	CD68	122.16	530.41	695.5
STAD	1122cd	CD8	55.25	182.69	724.75
STAD	1122cd	Foxp3	5.684	27.06	62.25
STAD	1122cd	PD1	3.165	0.29	8.253
STAD	11D43O	CD163	235.81	88.63	197.67
STAD	11D43O	CD3	213.15	319.56	396.64
STAD	11D43O	CD68	53.51	109.06	122.9
STAD	11D43O	CD8	143.35	365.58	330.52
STAD	11D43O	Foxp3	119.82	36.96	17.81
STAD	11D43O	PD1	8.458	9.466	5.226
STAD	16CDPQ	CD163	151.73	603.5	495.48
STAD	16CDPQ	CD3	256.54	1311.6	1957.4
STAD	16CDPQ	CD68	195.99	409.95	153.61
STAD	16CDPQ	CD8	479.18	811.43	1853.6
STAD	16CDPQ	Foxp3	55.7	137.26	144.06
STAD	16CDPQ	PD1	40.65	322.81	36.66
STAD	18FBV0	CD163	264.03	356.47	529.66
STAD	18FBV0	CD3	79.11	202.14	654.36
STAD	18FBV0	CD68	72.33	101.52	73.89
STAD	18FBV0	CD8	271.61	204.26	974.58
STAD	18FBV0	Foxp3	62.84	130.84	150.19
STAD	18FBV0	PD1	7.396	10.55	15.93
STAD	1BU6CN	CD163	256.91	566.08	1173.6
STAD	1BU6CN	CD3	225.88	485.62	1733.2
STAD	1BU6CN	CD68	159.51	330.26	303
STAD	1BU6CN	CD8	121.58	318.54	1093.9
STAD	1BU6CN	Foxp3	104.46	323.04	158.71
STAD	1BU6CN	PD1	36.09	29.65	176.96
STAD	1BWS8F	CD163	673.77	635.29	454.9
STAD	1BWS8F	CD3	579.02	1382.1	321.43
STAD	1BWS8F	CD68	1487.9	560.21	123.62
STAD	1BWS8F	CD8	1786.4	1258.5	1018.2
STAD	1BWS8F	Foxp3	127.03	136.31	56.91
STAD	1BWS8F	PD1	113.07	39.13	131.39
STAD	1F4NTQ	CD163	291.54	290.32	451.99
STAD	1F4NTQ	CD3	117.21	146.38	55.24
STAD	1F4NTQ	CD68	6.021	20.51	16.87
STAD	1F4NTQ	CD8	235.67	153.7	42.38
STAD	1F4NTQ	Foxp3	20.5	33.56	16.98
STAD	1F4NTQ	PD1	3.287	4.449	2.3
STAD	1FE2AU	CD163	472.41	803.49	862.8
STAD	1FE2AU	CD3	261.64	310.5	191.46
STAD	1FE2AU	CD68	204.33	242.3	96.31
STAD	1FE2AU	CD8	106.32	86.45	31.97
STAD	1FE2AU	Foxp3	45.36	11.47	8.179
STAD	1FE2AU	PD1	22.11	22.56	1.459
STAD	1J8TJ5	CD163	652.45	799.52	708.41
STAD	1J8TJ5	CD3	756.4	672.88	1630.4
STAD	1J8TJ5	CD68	522.48	98.35	47.12
STAD	1J8TJ5	CD8	402.17	507.14	887.9
STAD	1J8TJ5	Foxp3	57.97	207.54	297.88
STAD	1J8TJ5	PD1	29.38	22.71	17.29
STAD	1Q0RSK	CD163	70.14	175.56	212.05
STAD	1Q0RSK	CD3	224.13	226.04	48.44
STAD	1Q0RSK	CD68	409.1	238.88	91.37
STAD	1Q0RSK	CD8	200.12	198.77	108.7
STAD	1Q0RSK	Foxp3	40.25	29.54	7.827
STAD	1Q0RSK	PD1	3.565	1.441	2.669
STAD	1Q5ZHY	CD163	395.89	413.79	129.74
STAD	1Q5ZHY	CD3	159.99	147.98	128.46
STAD	1Q5ZHY	CD68	585.76	817.21	581.42
STAD	1Q5ZHY	CD8	122.88	54.29	11.05
STAD	1Q5ZHY	Foxp3	4.299	8.737	3.249
STAD	1Q5ZHY	PD1	4.524	4.519	3.233
STAD	1XXRYE	CD163	2145.6	2134.3	1028.8
STAD	1XXRYE	CD3	2557.5	3994.4	2684.1
STAD	1XXRYE	CD68	888.74	904.78	504.22
STAD	1XXRYE	CD8	3239.6	4149.5	2820.9
STAD	1XXRYE	Foxp3	336.3	533.15	125.2
STAD	1XXRYE	PD1	306.13	347.36	120.94
STAD	1Z0XEH	CD163	525.05	1004.5	962.27
STAD	1Z0XEH	CD3	94.22	701.24	187.61
STAD	1Z0XEH	CD68	117.5	631.33	484.06
STAD	1Z0XEH	CD8	481.31	608.62	537.58
STAD	1Z0XEH	Foxp3	14.15	75.18	29.12
STAD	1Z0XEH	PD1	4.442	9.721	10.99
STAD	1d895f	CD163	468.94	403	452.26
STAD	1d895f	CD3	100.38	201	567.62
STAD	1d895f	CD68	255.27	265.74	294.83
STAD	1d895f	CD8	90.71	198.02	267.3
STAD	1d895f	Foxp3	15.31	23.7	91.61
STAD	1d895f	PD1	2.026	3.099	2.305
STAD	1df560	CD163	2027.5	1389.6	606.56
STAD	1df560	CD3	3773	3667	2034.7
STAD	1df560	CD68	1045.2	1091.3	639.44
STAD	1df560	CD8	2375.5	4358	2311.2
STAD	1df560	Foxp3	632.64	508.93	239.96
STAD	1df560	PD1	16.12	16.5	42.08
STAD	267146	CD163	291.25	324.2	686.4
STAD	267146	CD3	119.49	328.85	384.38
STAD	267146	CD68	195.88	659.15	736.72
STAD	267146	CD8	449.5	469.42	459.56
STAD	267146	Foxp3	100.15	253.91	465.52
STAD	267146	PD1	0.3292	1.71	0
STAD	37c5ef	CD163	372.8	464.19	257.65
STAD	37c5ef	CD3	1890.5	1980.5	520.1
STAD	37c5ef	CD68	1511.6	1804.7	1039.5
STAD	37c5ef	CD8	2503	2250.1	471.39
STAD	37c5ef	Foxp3	434.54	406	194.31
STAD	37c5ef	PD1	6.538	9.099	14.1
STAD	76cf3b	CD163	215.22	453.63	1065.2
STAD	76cf3b	CD3	18.25	26.75	330.23
STAD	76cf3b	CD68	72.52	356.79	136.41
STAD	76cf3b	CD8	88.08	98.2	399.67
STAD	76cf3b	Foxp3	173.24	283.49	797.87
STAD	76cf3b	PD1	17.1	0	4.065
STAD	7a0a14	CD163	109.92	363.21	690.88
STAD	7a0a14	CD3	170.94	117.81	240.05
STAD	7a0a14	CD68	40.47	298.35	642.39
STAD	7a0a14	CD8	276.96	353.03	454.64
STAD	7a0a14	Foxp3	5.223	76.04	212.05
STAD	7a0a14	PD1	7.237	1.074	3.751
STAD	8ba702	CD163	602.66	429.17	156.46
STAD	8ba702	CD3	1534.6	3479.5	171.03
STAD	8ba702	CD68	132.52	49.91	0.6322
STAD	8ba702	CD8	745.06	982.92	126.53
STAD	8ba702	Foxp3	633.97	498.98	72.86
STAD	8ba702	PD1	0	1.244	0
STAD	8f0a41	CD163	863.92	773.14	964.79
STAD	8f0a41	CD3	387.31	466.12	1189.9
STAD	8f0a41	CD68	301.5	184.33	107.73
STAD	8f0a41	CD8	671.02	762.14	1495.2
STAD	8f0a41	Foxp3	70.21	32.48	108.62
STAD	8f0a41	PD1	0	4.881	0
STAD	FGBJWG	CD163	825.46	1011.4	567.46
STAD	FGBJWG	CD3	791.96	2300.6	1593.2
STAD	FGBJWG	CD68	60.91	112.6	140.14
STAD	FGBJWG	CD8	1509.7	1303.1	1088.7
STAD	FGBJWG	Foxp3	248.39	284.55	143.97
STAD	FGBJWG	PD1	134.86	277.47	214.86
STAD	GGMQEV	CD163	532.27	1491.7	1300.6
STAD	GGMQEV	CD3	591.81	536.97	1174.1
STAD	GGMQEV	CD68	1280.4	1828.7	2293.8
STAD	GGMQEV	CD8	755.83	483.27	736.45
STAD	GGMQEV	Foxp3	107.82	174.89	197.08
STAD	GGMQEV	PD1	145.09	63.71	18.32
STAD	XSMLSK	CD163	606.81	738.02	438.71
STAD	XSMLSK	CD3	447.65	632.44	287.79
STAD	XSMLSK	CD68	164.71	204.02	126.3
STAD	XSMLSK	CD8	199.81	329.95	531.39
STAD	XSMLSK	Foxp3	9.062	14.06	2.08
STAD	XSMLSK	PD1	53.08	26.53	9.715
STAD	cff16d	CD163	118.68	558.94	700.96
STAD	cff16d	CD3	178.09	479.81	1112.3
STAD	cff16d	CD68	206.65	353.1	334.3
STAD	cff16d	CD8	333.27	656.38	1067.1
STAD	cff16d	Foxp3	462.1	396.22	320.34
STAD	cff16d	PD1	0	5.743	24.43
